# Supplementary material for: Classical and Non-classical Presentations of Complement Factor I Deficiency: Two Contrasting Cases Diagnosed via Genetic and Genomic Methods
Source: PubMed Central journal article supplement (PMC6568211; doi:10.3389/fimmu.2019.01150), 2019-06-07
Supplement: Data_Sheet_1.pdf [file Data_Sheet_1.pdf]

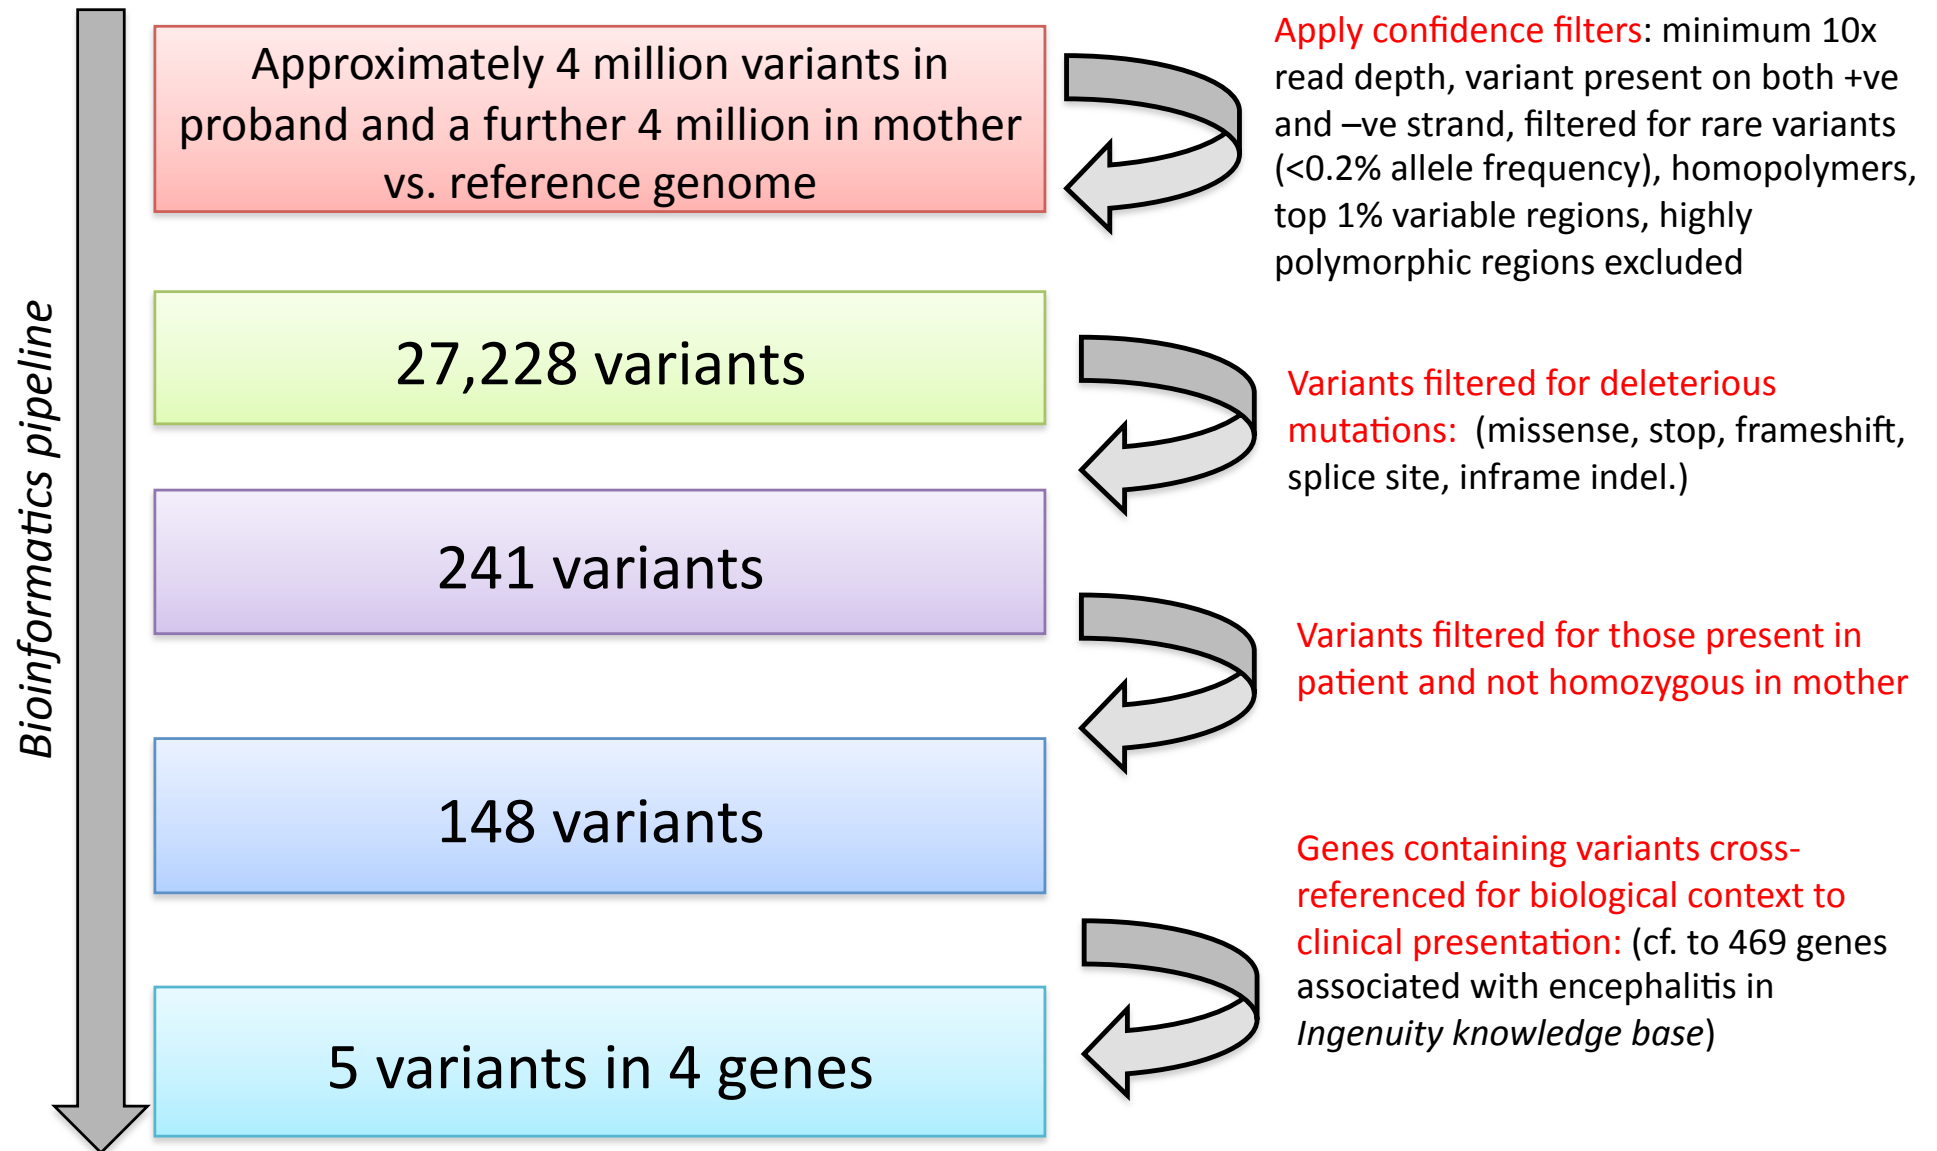

**Supplementary Figure 1: Bioinformatics pipeline identifying clinically relevant variants following whole genome sequencing:** Illumina 150bp paired-end reads were mapped to hs37d5 using Stampy (V1.0.23) and duplicate reads were marked with Picard (V1.111). Variants were called across both samples simultaneously with Platypus (V0.8.1) using default settings, except for minFlank=0-. Filtering was performed using Ingenuity VA (see [www.qiagenbioinformatics.com/products/ingenuity-variant-analysis](http://www.qiagenbioinformatics.com/products/ingenuity-variant-analysis))

| Chr | Position    | Ref | Alt | Gene Region                   | Gene                           | Comp het | Transcript ID                                                                                                                                                                                    | Transcript Variant                                                                                                | Protein Variant     | Patient B - Genotype | Patient B mother - Genotype | SIFT Function Prediction | PolyPhen-2 Function Prediction | CADD Score |
|-----|-------------|-----|-----|-------------------------------|--------------------------------|----------|--------------------------------------------------------------------------------------------------------------------------------------------------------------------------------------------------|-------------------------------------------------------------------------------------------------------------------|---------------------|----------------------|-----------------------------|--------------------------|--------------------------------|------------|
| 4   | 110,687,776 | G   | T   | Exonic                        | <i>CFI</i> ; <i>AC004067.6</i> | 0        | NM_001318057.1;<br>ENST00000394634.6;<br>NM_001331035.1;<br>NM_000204.4;<br>ENST00000394635.7;<br>ENST00000645635.1;<br>ENST00000510800.1;<br>ENST00000618244.4;<br>ENST00000512148.5            | c.262C>A                                                                                                          | p.Q88K              | Het                  | Het                         | Tolerated                | Possibly Damaging              | < 10       |
| 4   | 110,687,847 | G   | A   | Exonic                        | <i>CFI</i> ; <i>AC004067.6</i> | 1        | NM_001318057.1;<br>ENST00000394634.6;<br>NM_001331035.1;<br>NM_000204.4;<br>ENST00000394635.7;<br>ENST00000645635.1;<br>ENST00000510800.1;<br>ENST00000618244.4;<br>ENST00000512148.5            | c.191C>T                                                                                                          | p.P64L              | Het                  |                             | Damaging                 | Probably Damaging              | 33         |
| 5   | 41,149,482  | T   | G   | Exonic                        | <i>C6</i>                      | 0        | NM_001115131.2;<br>ENST00000263413.7;<br>NM_000065.3;<br>ENST00000337836.9                                                                                                                       | c.2484A>C                                                                                                         | p.Q828H             | Het                  | Het                         | Tolerated                | Benign                         | 15.08      |
| 5   | 149,782,705 | G   | A   | Exonic;<br>ncRNA;<br>Intronic | <i>CD74</i>                    | 0        | ENST0000009530.11;<br>NR_157074.1;<br>NM_001025159.2;<br>NM_004355.3;<br>ENST00000353334.10;<br>ENST00000377795.7;<br>ENST00000524315.5;<br>NM_001364083.1;<br>NM_001025158.2;<br>NM_001364084.1 | c.563-517C>T; c.<br>538-517C>T; c.<br>626-517C>T; n.<br>619C>T; c.<br>442-517C>T; c.<br>796C>T; c.<br>442-1138C>T | p.R266C             | Het                  |                             | Damaging                 | Probably Damaging              | 35         |
| 1   | 198,685,960 | A   | G   | Exonic                        | <i>PTPRC</i>                   | 0        | ENST00000348564.11;<br>NM_080921.3;<br>NM_002838.4;<br>ENST00000442510.7                                                                                                                         | c.958A>G; c.<br>1441A>G                                                                                           | p.K320E;<br>p.K481E | Het                  | Het                         | Tolerated                | Benign                         | < 10       |

**Supplementary Figure 2: Remaining variants following cross referencing to genes associated with encephalitis in Ingenuity Knowledge Base: Variants in complement factor I are highlighted in red**

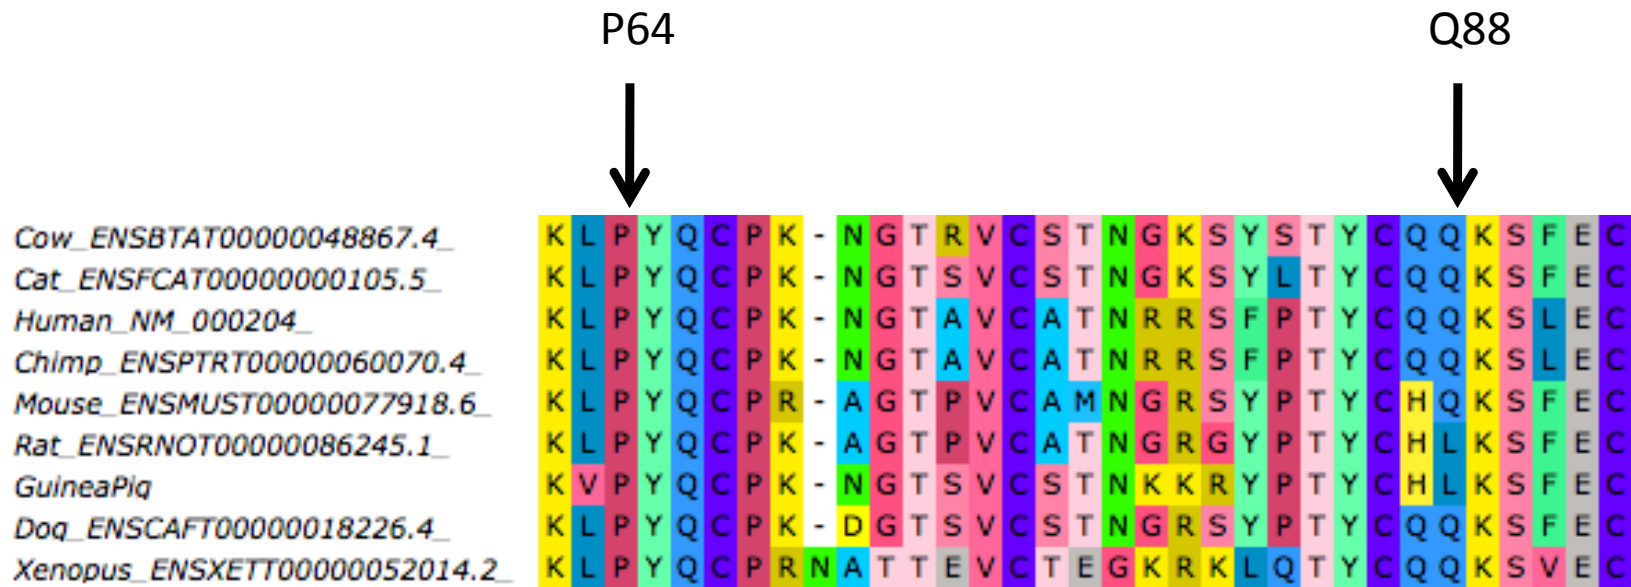

**Supplementary Figure 3:** Protein sequence alignment of CFI across taxa: The P64 residue and Q88 residue, variants of which were identified in Patient B are highlighted and are highly conserved across taxa.

**Supplementary Information: OxClinWGS HICF2 sequencing & analysis consortium**

**NIHR Oxford Biomedical Research Centre, Wellcome Centre for Human Genetics, University of Oxford, Oxford OX3 7BN, UK**

Jenny C. Taylor  
Samantha J. L. Knight  
Alistair T. Pagnamenta  
Niko Popitsch\*  
Carme Camps  
Melissa M. Pentony  
Erika M. Kvikstad  
Lukas Lange  
Mona Hashim  
Steve Harris  
Mark Tilley  
Dimitris Vavoulis  
Pamela Kaisaki  
Vassilis Ragoussis  
Matteo Ferla

\*Now at The Children's Cancer Research Institute (CCRI), 1090 Vienna, Austria

**Oxford Molecular Diagnostics Centre, Department of Oncology, University of Oxford, Oxford OX3 9DU, UK**

Anna H. Schuh  
Helene Dreau  
Kate E. Ridout  
Pauline Robbe  
Pavlos Antoniou  
Outi Salminen  
Maite Cabes  
Laura Lopez  
Angela Hamblin

**Oxford NHS Regional Molecular Genetics Laboratory, Oxford University Hospitals NHS Trust, Oxford OX3 7LE, UK**

John Taylor  
Conrad Smith

Supplementary Table 1: Results of immunological investigations in patient A and B

|                                                                                           | <b>Patient A</b>                               | <b>Patient B</b>                      |
|-------------------------------------------------------------------------------------------|------------------------------------------------|---------------------------------------|
| C3 (mg/dl)                                                                                | 21.0 (65-190)                                  | 43.0 (75-175)                         |
| C4 (mg/dl)                                                                                | 26.9 (14-40)                                   | 16.0 (14-54)                          |
| CH50                                                                                      | 27% normal                                     | 876 (1000-2000)                       |
| AP50                                                                                      | 20% normal                                     | Failed to reach 50% of normal control |
| Terminal complement complex (ng/ml)                                                       | 2340 (0-80)                                    | 331 (0-80)                            |
| C5 (mg/L)                                                                                 | 46.5 (90-172)                                  | N.D.                                  |
| C6 (mg/L)                                                                                 | 81.6 (45-96)                                   | N.D.                                  |
| C7 (mg/L)                                                                                 | 56.1 (55-85)                                   | N.D.                                  |
| C8 (mg/L)                                                                                 | 103 (40-80)                                    | N.D.                                  |
| C9 (mg/L)                                                                                 | 246 (50-250)                                   | N.D.                                  |
| Factor H (mg/L)                                                                           | 211 (345-590)                                  | N.D.                                  |
| Factor I (mg/L)                                                                           | <2.4 (38-58)                                   | <5.6 (38-58)                          |
| Factor B (mg/L)                                                                           | 29.7 (295-400)                                 | N.D.                                  |
| Serotype specific anti pneumococcal antibodies (protective titer defined as > 0.35mcg/ml) | 4/12 at baseline<br>9/12 post Prevenar booster | N.D.                                  |
| Haemophilus influenza B antibodies                                                        | Protective post Menitorix booster              | N.D.                                  |
| Tetanus antibodies                                                                        | Protective                                     | N.D.                                  |
| Serum electrophoresis                                                                     | Absent $\beta$ 2 peak                          | Normal                                |

N.D. - not determined.

Normal ranges are provided in parenthesis
